# Supplementary material for: Effectiveness of a tailored web app on sun protection intentions and its implications for skin cancer prevention: A randomized controlled trial
Source: PubMed Central journal article supplement (PMC9931317; doi:10.1371/journal.pdig.0000032), 2022-05-12
Supplement: pdig.0000032.s005.pdf [file pdig.0000032.s005.pdf]

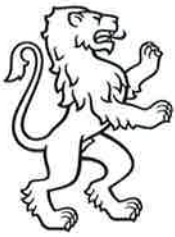

University of Zurich  
Epidemiology, Biostatistics and Prevention  
Institute  
Vasileios Nittas  
Hirschengraben 84  
8001 Zurich

Kanton Zürich  
**Kantonale Ethikkommission**

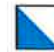

**Prof. Dr. med. Peter Meier-Abt**  
Präsident

**Dr. med. Peter Kleist**  
Geschäftsführer  
Stampfenbachstrasse 121  
Postfach  
8090 Zürich  
Telefon +41 43 259 79 70  
Fax +41 43 259 79 72  
[www.kek.zh.ch](http://www.kek.zh.ch)

08. November 2019 / mom

**BASEC-Nr. Req-2019-01102**

**Clarification of responsibility**

**SUN-sitive: Assessing the Effects of Digital Melanoma Prevention and  
Skin Health Promotion**

Dear Mr Nittas

We refer to your submission dated 06.11.2019

Your research project does not fall within the scope of the Human Research Act (HRA).  
Therefore, an authorization from the ethics committee is not required.

Kindly note that an invoice in the amount of CHF 100.- will be issued by the cantonal  
accounts department.

Sincerely yours,



Peter Kleist
