# Supplementary material for: Effectiveness of a tailored web app on sun protection intentions and its implications for skin cancer prevention: A randomized controlled trial
Source: PLOS Digit Health. 2022 May 12;1(5):e0000032. doi: 10.1371/journal.pdig.0000032 (PMC9931317; doi:10.1371/journal.pdig.0000032)
Supplement: S1 Data — (XLSX) [file pdig.0000032.s006.xlsx]

## Sheet: SUNsitive_Baseline_A.2021
group	patient	gender	age	relationship	income	education	mountains_baseline	intentions_mean_T1	intentions_mean_T2	efficacy_mean_T1	efficacy_mean_T2	attitude_mean_T1	attitude_mean_T2	solarium_mean_T1	solarium_mean_T2	smoking_T1	smoking_T2	smoking_status_T1	smoking_status_T2	cig_day
1	4139	1	25	0	1	3	1	0.875	1.5625	1.33333	1.5	1.66667	1.83333	4	4	1	1	5	5
1	4141	0	40	1	4	3	1	2.875	2.875	2.83333	2.16667	1	1.33333	2.5	2	1	1	5	5
1	4146	1	62	2	1	2	1	2.8125	2.3125	2.5	2.16667	1.5	1.5	4	4	1	1	5	5
1	4148	1	43	1	0	1	1	2.375	2.5	3.16667	2.16667	0.833333	1.33333	3	2.5	1	1	5	5
1	4150	0	69	1	1	2	1	2.375	2.625	2.33333	2.5	3	2.83333	4	4	0	0	0	0	3
1	4152	0	65	1	2	3	0	2.4375	2.625	2.33333	2.83333	1.5	1.66667	4	4	1	1	5	5
1	4157	1	29	0	2	3	0	3.5	3.125	3	3.33333	2.5	2.66667	4	4	1	1	5	5
1	4164	0	39	4	2	3	1	3.1875	2.9375	3.16667	3.16667	2.16667	1.33333	4	4	0	0	2	1	4
1	4168	1	31	1	1	2	1	2.1875	3.4375	1.66667	2.16667	2.66667	3	2.5	3.5	1	1	5	5
1	4177	1	59	1	0	2	1	2.125	2.8125	2.33333	2.66667	1.16667	1.33333	2.5	3	1	1	4	4
1	4178	1	51	0	2	3	1	1.75	3.5625	1.66667	2.33333	2.66667	2.83333	3	3.5	0	0	1	1	25
1	4181	1	48	1	1	3	1	1.3125	1.625	0.833333	1.5	0.333333	1.16667	4	4	1	1	5	5
1	4185	0	42	1	0	2	1	1.375	1.625	2.66667	2	1.33333	1	4	3.5	1	1	4	4
1	4186	1	55	0	4	3	1	2.25	1.875	2	1.83333	0.166667	1	0	0.5	1	1	4	4
1	4187	0	44	1	2	2	1	2.8125	2.625	2.83333	2.83333	2	1.33333	4	4	1	1	5	5
1	4188	1	57	1	3	2	1	2.125	2.5	1.33333	2.16667	2.5	1.5	4	3.5	1	0	5	0
1	4189	0	40	1	1	3	1	1.8125	2.25	0.5	0.833333	2.16667	2.83333	4	4	0	0	0	1	1
1	4190	1	54	1	1	3	1	2.0625	3.5625	3.16667	3.5	1.66667	2.16667	2.5	4	1	1	5	5
1	4191	0	71	1	1	3	0	1.75	2.0625	2.16667	2.5	2.5	3	3.5	3	1	1	5	5
1	4200	0	40	1	3	3	1	2.4375	2.5625	1.5	2.33333	1.83333	1.16667	4	3.5	1	1	4	4
1	4206	1	30	0	4	3	0	2.6875	3.0625	2.5	2.83333	1.83333	2.66667	2.5	4	1	1	5	5
1	4208	0	66	2	0	2	1	0.9375	0.625	0.833333	0.5	1	0.833333	3.5	2.5	0	0	0	0	12
1	4210	1	70	5	0	3	1	3	3.0625	2.16667	2.5	1.5	1.16667	4	4	1	1	4	4
1	4213	1	42	0	1	3	1	2.625	2.375	1.83333	1.16667	1.33333	1	3	2.5	1	1	5	5
1	4215	0	60	2	2	2	1	2	2.6875	1.83333	2.66667	2.16667	1.66667	3.5	3.5	1	1	4	4
1	4219	0	31	1	1	2	1	2.5	2.6875	2	1.66667	2.16667	1.5	4	4	1	1	5	5
1	4228	0	41	1	2	3	1	2.75	2.875	2.16667	2.33333	2	1.83333	4	4	1	1	5	5
1	4230	0	58	2	2	3	1	2.3125	2.6875	1.5	1.83333	2	2.16667	4	4	1	1	5	5
1	4239	0	38	1	2	3	0	2.8125	3.125	3.16667	3	3.33333	3.33333	4	4	1	1	4	4
1	4241	0	52	0	2	3	0	3.0625	2.875	2.5	2.66667	2.5	3	4	4	1	1	4	4
1	4244	1	39	1	0	3	1	1.875	1.625	1	1.33333	2.33333	3	4	4	1	1	5	5
1	4246	1	33	1	2	2	1	3.25	3.1875	2.66667	2.66667	1.16667	0.666667	0.5	1.5	1	1	5	5
1	4248	1	43	1	1	3	0	3.3125	3.5	3	3.33333	1.16667	0.833333	2	2.5	1	1	5	5
1	4260	1	70	1	0	2	1	3.0625	2.625	3.16667	2.16667	1.66667	2.66667	4	4	1	1	5	5
1	4264	1	42	0	0	2	0	2.4375	3.3125	2.66667	3.33333	2.16667	2.16667	3	3.5	1	1	5	5
1	4267	0	58	2	0	2	0	1.0625	0.875	2	1.83333	1.66667	1.5	4	4	0	0	0	0	25
1	4268	1	63	1	0	3	1	2.4375	2.0625	2.83333	2.33333	3.66667	3.83333	4	4	1	1	5	5
1	4273	0	64	1	2	3	1	3	3.5625	2	3.33333	1.66667	2.33333	4	4	0	1	0	4	1
1	4274	0	69	1	0	2	1	2.3125	2.0625	1.83333	2	2.66667	2.83333	3.5	2.5	1	1	4	4
1	4284	0	43	1	2	2	1	1.8125	3.5625	1.33333	1.33333	1.16667	1.16667	1	1.5	1	1	4	4
1	4288	1	33	0	2	2	1	2.5	2.375	2	2.33333	1.66667	1.5	2	2.5	0	0	0	0	10
1	4291	0	37	2	3	2	1	2.125	1.375	1	1	2.16667	1.66667	4	4	0	0	0	0	20
1	4295	0	45	2	2	3	0	2.25	2.8125	2	2.5	1.33333	1.66667	2.5	3.5	1	0	4	1
1	4296	0	49	1	2	3	1	2.8125	2.4375	2	2.5	1.83333	1.5	4	3.5	1	1	5	5
1	4302	1	75	2	0	2	0	2.625	2.3125	3	2.16667	2.33333	2.16667	4	4	1	1	4	4
1	4306	0	64	0	0	3	0	2.1875	2.8125	1.5	2.16667	3	2.66667	3	3.5	1	1	4	4
1	4309	1	55	0	1	1	0	2.875	2.6875	2.66667	2.16667	2.16667	2.5	3.5	4	1	1	4	4
1	4311	1	75	0	0	2	0	2.4375	2.8125	1.83333	2.66667	1.33333	1.16667	4	4	1	1	5	5
1	4312	0	74	1	1	3	0	2.5625	2.6875	2.5	2.66667	2.83333	2	4	4	1	1	5	5
1	4313	1	67	5	0	2	0	3.625	3.6875	3.5	3.5	2.83333	1.83333	3	3	1	1	5	5
1	4316	0	43	4	0	3	1	2.6875	3.1875	2.83333	2.83333	1.83333	2.66667	3.5	3.5	0	1	1	3	12
1	4317	0	44	1	2	2	1	2.875	2.8125	2.83333	2	1.83333	2	3.5	4	1	1	3	3
1	4319	0	44	2	2	3	1	2.5	2.9375	2.66667	2.83333	2.33333	2.5	3.5	4	1	1	5	5
1	4321	1	31	0	1	3	1	1.125	3.5625	1.83333	2.33333	2.83333	1.66667	4	4	1	1	4	4
1	4322	1	27	0	1	3	0	2.375	2.75	2.16667	2.16667	0.833333	1.33333	4	3.5	1	1	5	5
1	4326	0	40	0	2	0	1	3	2.875	3	2.33333	1.5	1.33333	3.5	3.5	1	1	4	4
1	4330	1	60	0	1	2	0	3.25	3	3.33333	3.33333	3.16667	2.5	2	3	1	1	5	5
1	4331	1	43	1	0	2	0	3	3.125	2.5	2.66667	2.83333	2.83333	4	4	1	1	5	5
1	4332	0	38	0	3	3	1	3.0625	3.25	2.16667	3.33333	2	1.66667	2.5	2.5	0	0	0	0	10
1	4334	1	28	0	0	3	1	1.875	2.0625	1.5	1.66667	1.83333	1.16667	4	4	1	1	5	5
1	4335	0	78	5	1	3	1	3.5625	3.625	3.5	3.83333	1.83333	2.83333	4	4	1	1	4	4
1	4339	0	39	0	0	2	0	2.875	2.75	2.5	2.5	1.83333	1.83333	2.5	3.5	1	1	5	5
1	4344	0	55	1	1	3	0	3	3.125	3.16667	3.5	3.83333	3.83333	4	4	1	1	5	5
1	4347	0	33	3	1	1	1	1.9375	1.9375	3.33333	2.16667	2.66667	3.16667	4	4	0	1	0	3	0.008
1	4348	1	32	1	1	3	1	2.8125	2.75	2.66667	2.16667	1.33333	1.33333	4	3	1	1	4	4
1	4351	1	52	1	0	2	1	3.3125	3.25	2.5	2.83333	2.5	2.66667	4	4	1	1	5	5
1	4353	1	18	0	0	2	1	2.0625	2.5625	1	1.83333	0.833333	0.833333	2.5	3	1	1	5	5
1	4354	1	24	0	0	2	1	2.5	3.5625	2.33333	2.5	2	2.33333	4	4	1	1	5	5
1	4373	1	36	0	1	3	1	3	2.9375	2.66667	2.66667	2.33333	1.83333	4	4	1	1	5	5
1	4375	0	40	1	1	2	1	2.4375	3	2	1.66667	2.66667	2.83333	4	4	1	1	5	5
1	4376	1	48	1	1	3	1	3.1875	3.0625	2.66667	3.16667	1.33333	1.5	2	3	1	1	5	5
1	4379	1	42	0	1	3	1	3.1875	3.4375	2.33333	2.33333	1.33333	1.33333	4	4	1	1	4	4
1	4380	1	44	1	0	3	1	2.75	3.125	2.66667	3	3.5	3.16667	4	4	1	1	5	5
1	4384	0	40	1	2	2	0	2.4375	2.875	1.83333	2	3.83333	3.83333	4	4	1	1	5	5
1	4387	1	47	0	1	3	0	2.625	2.125	2.33333	2.5	3	2.5	4	4	1	1	4	4
1	4391	1	65	1	0	1	0	2.4375	2.3125	2.33333	2	2.33333	2.66667	4	4	1	1	4	4
1	4393	0	45	1	4	3	1	2.3125	3.25	2.66667	3.16667	1.16667	1.33333	3	4	1	1	4	4
1	4394	1	64	1	0	2	0	3.1875	3.1875	2.66667	3.5	3.33333	3.5	4	4	1	1	5	5
1	4395	0	43	1	1	3	1	2.8125	3.125	2	2.5	2.33333	2.66667	4	4	1	1	4	4
1	4398	1	32	1	2	3	1	3.3125	3.4375	3.16667	3.16667	1.83333	2	4	4	1	1	4	4
1	4401	0	57	1	1	1	1	3.0625	2.6875	2	3.33333	1.33333	1.33333	4	4	1	1	4	4
1	4402	1	36	1	0	3	1	2.5625	2.8125	1.83333	2.5	3	2.66667	4	4	1	1	5	5
1	4410	0	44	1	3	3	1	2.8125	3.25	2.5	2.5	3.33333	3.5	4	4	1	1	5	5
1	4412	0	33	0	2	3	0	2.1875	2.1875	1.5	1.83333	2.33333	2.16667	4	4	1	1	5	5
1	4413	0	36	1	1	2	1	2.0625	3.0625	2.16667	2.33333	3.16667	3.16667	1	2	0	0	0	0	20
1	4420	1	72	1	0	2	1	3	2.9375	2.66667	2.66667	2.33333	1.83333	4	4	1	1	4	4
1	4422	0	27	0	1	3	0	2.375	2.1875	1.5	0.833333	2.5	2.16667	4	4	1	1	5	5
1	4423	1	41	1	3	3	1	2.8125	3.25	2.83333	2.33333	3	3	4	4	1	1	5	5
1	4426	0	37	0	0	2	1	1.5625	1.625	0.833333	1.33333	0.166667	0.166667	4	3.5	0	0	1	1	12
1	4430	0	35	1	1	2	1	3.4375	2.625	2.66667	2.33333	2	1.33333	4	4	1	1	5	5
1	4434	0	66	1	0	3	1	2.5	3.5625	2.66667	2.5	1.66667	2.33333	3	3.5	1	1	4	4
1	4437	0	38	0	2	2	0	1.5625	1.5625	1.33333	1.33333	2.66667	2.16667	4	4	1	1	4	4
1	4439	1	26	0	0	2	0	3.5	3.5625	3.33333	3.66667	2.83333	4	4	4	1	1	5	5
1	4441	0	31	0	0	3	1	2.9375	2.5	2.16667	1.83333	2	2.5	3	4	1	1	5	5
1	4449	0	75	1	1	3	0	1.75	2.625	0.833333	1.33333	1.16667	1.16667	1.5	1.5	0	0	1	2	6
1	4454	0	38	1	1	3	1	3.0625	3.1875	2.83333	2.83333	3.5	3.5	4	4	0	1	0	5	1
1	4456	0	39	3	3	3	0	2.5	3.1875	2.5	3.33333	1.66667	1.33333	4	4	1	1	4	4
1	4463	0	75	2	1	3	1	2.3125	2.1875	2.66667	2.5	2.83333	3.33333	4	3.5	1	1	5	5
1	4465	1	60	1	4	2	1	2.5	2.375	1.83333	1.66667	1.16667	1.33333	4	4	1	1	5	5
1	4466	0	69	1	1	3	1	2.5	2.625	2	1.66667	0.833333	1	4	4	1	1	5	5
1	4468	1	55	1	1	3	1	3	3	2	2.66667	1.66667	1.33333	4	4	1	1	4	4
1	4477	0	58	1	4	3	1	3.125	3.25	3.16667	3.33333	1	1.5	2.5	3	1	1	4	4
1	4498	0	66	1	1	3	1	2	2.625	0.833333	1.66667	1.66667	1	4	4	0	0	0	0	5
1	4501	0	64	1	3	2	1	3.8125	3.875	3.66667	3.83333	2	1.5	2	4	1	1	5	5
1	4502	1	44	1	2	2	1	2.8125	2.75	2	2.33333	1.83333	1.5	4	4	1	1	5	4
1	4504	0	57	2	1	3	1	2.375	2.625	1.5	2.33333	1.33333	1.83333	3.5	4	1	1	4	4
1	4506	1	43	1	1	2	1	2.8125	2.375	2.16667	2.16667	3	2.83333	2	1.5	1	1	5	5
1	4510	0	41	1	2	2	1	2.3125	2.625	2.66667	2.5	1.5	1.33333	4	3.5	1	0	5	0
1	4512	1	60	2	0	2	0	3.0625	3.5	2.66667	3	2	1.66667	2.5	2.5	1	1	5	5
1	4513	1	39	1	1	3	0	1.875	2.4375	2	1.83333	2.33333	1.33333	2.5	4	1	1	5	5
1	4521	0	36	1	2	3	1	2.4375	2.0625	2.33333	1.83333	1	1.16667	4	4	1	1	5	5
1	4522	0	38	1	2	2	1	3	3.375	3.33333	3.5	2.16667	4	4	4	1	0	4	2
1	4532	0	60	1	4	3	1	1.875	1.9375	1.66667	1.16667	1.16667	1.5	3.5	3.5	1	1	5	5
1	4533	0	38	1	3	3	1	2.875	3.25	2	2.5	0.333333	0	1	1	1	1	4	4
1	4534	1	44	1	1	3	1	3	2.75	2.83333	2.16667	1.66667	1.33333	3.5	4	1	1	5	5
1	4535	0	39	1	3	3	1	2.1875	3	2.33333	2.33333	1.66667	1.16667	4	4	1	1	5	5
1	4537	0	42	0	1	3	1	1.8125	2.0625	2.83333	2.66667	0.666667	0.5	4	4	1	1	5	5
1	4547	1	43	0	1	2	1	3.5	3.1875	3.16667	3.16667	2.83333	2.33333	4	4	1	1	5	5
1	4553	0	35	0	1	2	0	2.0625	2.125	2.16667	2.33333	3.16667	2.83333	4	4	1	1	5	5
0	4142	1	71	1	0	2	0	2	2.0625	1.83333	1.83333	2.33333	2.5	4	4	1	1	5	5
0	4144	0	38	1	2	3	1	2.9375	2.875	2.83333	3	2.16667	2.16667	2	2.5	1	1	5	5
0	4147	1	60	1	0	3	1	1.6875	1.5	2.33333	2.5	2.16667	1.5	2	2.5	0	1	0	4
0	4153	1	26	0	0	3	0	2.25	3.625	2.33333	2.33333	3.16667	3.66667	4	4	1	1	5	5
0	4159	1	32	0	0	3	1	2.125	2.0625	1.33333	1.5	1.16667	1	4	4	1	1	5	5
0	4170	0	33	1	2	2	1	1.5	1.625	1.16667	1.33333	1	1.16667	3	3	0	0	1	1	10
0	4173	0	25	0	2	3	1	2.3125	2.5	2.33333	1.33333	2.5	2.16667	4	4	0	0	1	0	3
0	4182	1	23	0	0	3	1	2.625	2.6875	2.16667	2.5	0.166667	0.333333	4	4	1	1	5	5
0	4183	0	69	2	0	1	0	2.6875	2.625	2.16667	2.16667	2.16667	2.66667	1.5	2	1	1	4	4
0	4193	1	59	1	1	1	1	2.9375	3.0625	3.33333	2.83333	3.33333	3.66667	4	4	1	1	5	5
0	4197	0	36	1	3	3	1	2.3125	2.25	2.5	2.33333	1	1	2	3	1	1	5	5
0	4198	0	49	0	2	2	1	2.0625	2.125	0.166667	1.5	1.16667	1.33333	4	4	1	1	4	4
0	4201	0	37	1	2	3	1	1.125	0.8125	0.666667	1.16667	1.5	1	4	4	0	0	0	0	15
0	4205	1	37	1	0	3	1	3.125	3.3125	3.5	3.5	2.83333	2.5	4	4	1	1	4	4
0	4212	1	50	1	0	2	1	3	3.25	2.83333	2.5	2.66667	2.33333	4	4	1	1	5	5
0	4214	0	41	1	2	3	1	3.5	3.375	3.33333	2.33333	2.33333	2.16667	4	4	1	1	5	5
0	4222	0	69	2	0	3	0	0.5625	0.3125	0.166667	0.166667	2.33333	2.33333	2	3	1	1	3	3
0	4223	0	65	0	0	3	0	1.5	1.875	1	1.33333	2	1.66667	3.5	4	1	1	5	5
0	4225	0	43	1	2	3	1	2.75	3.125	3	2.16667	1.33333	2	4	4	1	1	5	5
0	4226	0	74	0	1	3	0	3.5625	3.4375	3.5	3.33333	2.66667	3.83333	4	4	1	1	4	4
0	4227	0	54	1	3	3	1	2.25	3	2.16667	2.66667	1.83333	2.5	4	4	1	1	5	5
0	4229	1	54	1	0	1	1	2.8125	3.5	3.16667	2.5	2.33333	2.5	4	4	1	1	5	5
0	4232	0	40	2	1	3	1	2.375	1.75	2.83333	2	2.66667	2.16667	4	4	0	0	1	1	17
0	4237	0	31	0	1	3	0	2.625	2.75	2.16667	2.16667	1.66667	1.16667	4	4	0	0	1	1	2
0	4243	0	77	1	0	2	0	3.5	3.5	3.5	3.66667	2	0.833333	4	4	1	0	3	2
0	4245	1	40	1	0	2	0	2.5625	3	2.66667	2	2.33333	2.5	4	4	1	1	4	4
0	4249	1	34	5	1	1	1	3.25	2.5625	2.83333	3	3.16667	3.16667	3.5	3	1	1	5	5
0	4251	0	36	1	2	3	1	2.1875	2.0625	1.66667	2	3.16667	2.5	3.5	3.5	1	1	5	5
0	4253	1	62	2	0	3	1	2.5	2.375	1.16667	2.5	1.66667	1.66667	4	4	1	1	3	3
0	4254	1	68	2	0	2	0	3.3125	3.5	3.33333	3.66667	1.33333	1	4	4	1	1	4	4
0	4255	0	55	1	2	3	0	2.3125	2.375	2.5	2.16667	3.66667	2.66667	4	4	1	1	5	5
0	4256	1	64	1	0	1	1	2.6875	2.3125	2	2	0.666667	1.16667	4	4	1	1	4	4
0	4258	1	40	2	0	3	1	2.875	3.125	1.83333	3.16667	3.33333	3.16667	2	3.5	1	1	5	5
0	4259	0	67	1	2	3	1	2.4375	3.5625	2.5	2.66667	1.5	1.5	4	3.5	1	1	4	4
0	4261	1	53	0	2	2	1	2.8125	2.3125	2.33333	2	1	1.33333	3	3	1	1	5	5
0	4262	0	41	4	1	3	1	3.0625	3.4375	3	2.83333	2.66667	2.33333	3	2	0	0	0	0	24
0	4263	0	52	0	2	3	1	1.4375	1.25	1	1.16667	2.5	3.33333	2.5	1.5	1	1	5	5
0	4265	1	27	1	0	2	1	2.625	3	1.66667	1.5	1.83333	1.33333	4	4	1	1	4	4
0	4269	1	73	5	1	3	1	3.0625	3.375	2.16667	2.66667	2.83333	2.83333	4	4	1	1	5	5
0	4270	0	41	0	2	3	1	2.125	2.4375	2.16667	2	2.16667	1.83333	3.5	4	1	1	5	5
0	4282	0	59	1	2	3	0	3.375	3.4375	3.33333	3.5	1.5	1.5	4	4	1	1	5	5
0	4283	0	39	1	1	2	1	2.1875	2.625	2.66667	2.33333	3.83333	3.83333	4	4	1	1	4	4
0	4285	1	38	0	1	3	1	3.125	3.0625	2.16667	1.83333	2.5	2.5	1.5	1.5	0	0	0	0	15
0	4286	0	47	1	2	3	1	2.625	2.8125	2.33333	2.33333	3.16667	3	4	4	1	1	4	4
0	4287	1	42	1	0	1	1	3.625	3.5625	3	3.16667	2.16667	2.5	4	4	1	1	5	5
0	4290	1	23	0	0	3	1	3	3.1875	1.83333	2.16667	3.33333	3	4	4	1	1	5	5
0	4297	1	40	1	0	1	1	3.0625	3	2.33333	2.83333	1.5	1.66667	4	3.5	1	1	5	5
0	4301	0	64	1	2	3	0	1.375	1.75	1.83333	1.33333	1	1	3.5	4	1	1	5	5
0	4304	0	32	1	1	2	1	1.875	2.375	1.66667	1.66667	1.66667	1.16667	4	4	1	1	4	4
0	4305	0	55	1	1	1	1	1.5	1.875	1.83333	1	1.16667	0.666667	2	2	1	1	4	4
0	4307	0	64	1	2	2	1	2.125	2.1875	2	2.16667	0.333333	0.833333	4	4	1	1	4	4
0	4310	1	58	2	2	2	1	3.375	3.125	3.16667	2.83333	0.666667	0.333333	3.5	2.5	0	0	1	1	15
0	4314	0	35	3	2	3	1	1.625	1.75	0.833333	0.666667	1.66667	1.16667	3.5	3	1	1	4	4
0	4315	1	72	1	1	1	1	3.6875	3.4375	2.66667	3	1.83333	1.83333	4	4	1	1	5	5
0	4318	1	52	1	1	2	1	2.125	2.1875	1.66667	1.66667	1.83333	1.5	2.5	2	1	1	5	5
0	4324	0	60	1	0	2	1	2.4375	2.75	1.5	1.83333	3	2	4	4	1	0	4	0
0	4333	1	41	0	0	3	1	2.6875	2.625	1.66667	1.83333	1.83333	3.16667	3	3	1	1	4	4
0	4336	1	55	2	0	2	1	1.75	1.6875	1.66667	2	1.33333	1.33333	2.5	2	1	1	5	5
0	4337	0	46	0	1	2	1	2.4375	2.5	2.83333	3	3	2.5	3.5	3.5	1	1	5	5
0	4340	1	63	2	1	3	0	2.625	2.3125	2.83333	2.66667	1.33333	0.666667	4	3.5	1	1	4	4
0	4342	0	53	1	3	3	0	2.75	2.8125	2.5	2	1.16667	1.33333	0.5	1.5	1	1	4	4
0	4345	1	42	1	1	2	1	1.625	1.875	2	1.83333	2	1.66667	4	4	1	1	5	5
0	4349	1	19	0	0	1	1	2.6875	2.4375	2	2	1	1.16667	2.5	2.5	1	1	5	5
0	4350	1	64	1	0	2	1	2.375	2.625	2	2.66667	1.16667	1.33333	4	4	1	1	5	5
0	4357	0	67	1	1	1	1	2.75	2.625	1.83333	1.5	1.33333	0.666667	3	2.5	1	1	4	4
0	4360	0	33	1	2	3	1	2.0625	2.25	2.16667	2	2.66667	2.5	2.5	3	1	1	5	5
0	4366	0	70	1	1	1	1	2.25	2.3125	2	2.33333	2.16667	1.66667	4	4	1	1	5	5
0	4367	1	63	1	0	3	0	3.375	3.1875	2.33333	2.33333	1	1.66667	3.5	4	1	1	4	4
0	4368	0	51	0	4	3	0	3.625	3.5625	3.5	3.5	2.5	2.83333	4	4	1	1	5	5
0	4374	0	55	1	4	3	1	3.0625	3.25	2.66667	2.5	2	1.83333	3.5	3.5	1	1	4	4
0	4381	1	64	0	1	1	1	3.1875	3.75	3.33333	3.83333	2.33333	2	4	4	1	1	5	5
0	4383	1	47	0	2	3	1	3.75	3.6875	3.33333	3.66667	2	1.83333	4	4	1	1	4	4
0	4386	0	70	1	1	3	0	2.625	2.75	2.16667	1.66667	2.33333	2	4	4	1	1	5	5
0	4388	0	43	0	1	3	0	1.4375	2.25	0.833333	1.66667	2.5	2.33333	2.5	2.5	1	1	5	5
0	4389	1	44	1	0	2	1	3.125	3.3125	2.5	3	2.16667	1.83333	4	4	1	1	4	4
0	4397	1	49	0	0	3	0	1.9375	2.6875	1.83333	2.5	3.83333	3.83333	4	4	1	1	4	4
0	4405	1	29	0	0	3	1	2.5	2.75	1.33333	2	1.16667	1.33333	3.5	3.5	1	1	5	5
0	4406	1	75	1	1	3	0	3.125	3.4375	2.66667	3	3.66667	3.83333	4	4	1	1	4	4
0	4409	1	34	1	0	3	1	1.875	2.8125	2.33333	2.66667	2.5	2	4	4	1	1	5	5
0	4411	1	56	0	3	3	0	1.25	1.375	2.33333	1.16667	1.16667	1.5	2.5	2.5	1	1	5	5
0	4417	1	35	0	0	1	1	1.9375	2.4375	2.33333	2.16667	1.16667	1.33333	1.5	1	0	0	1	1	25
0	4419	1	42	0	1	2	1	3.1875	2.9375	3.33333	2.66667	1.66667	1.33333	2.5	3.5	1	1	4	4
0	4427	1	62	1	1	2	0	2.4375	3.375	2	3.16667	1.66667	1.5	4	4	1	1	4	4
0	4428	1	25	0	0	3	0	2.375	2.5	3.5	3.5	3.66667	4	4	4	1	1	5	5
0	4429	1	68	2	0	2	1	2.6875	3.25	2.5	3	3.33333	1.66667	4	4	1	1	5	4
0	4431	1	60	1	0	1	1	2.6875	3.5	2.5	3.5	2.83333	3.16667	4	4	1	1	4	4
0	4438	1	37	0	1	2	1	2.625	2.6875	2.33333	2.66667	2.5	2.33333	4	4	0	0	1	1	17
0	4445	0	68	5	3	3	1	2.4375	3.25	3	3.16667	1.83333	2	4	3.5	1	1	4	4
0	4446	0	40	0	1	3	1	2.25	2.4375	2.33333	2.5	0.666667	1	0.5	3	0	0	0	0	20
0	4452	1	30	1	0	3	1	3	2.9375	1.5	1.83333	2.33333	2	4	4	1	1	5	5
0	4455	1	53	1	0	2	1	2.1875	2	2.33333	1.66667	2.5	2.33333	4	4	1	1	5	5
0	4457	1	55	1	1	3	1	1.5625	2.5625	1.66667	2.5	1.66667	1.5	4	4	1	1	5	5
0	4461	0	35	1	1	2	1	2.625	2.5	2.33333	2.16667	2.33333	2	3	3	0	0	0	0	3
0	4462	0	41	0	2	3	0	1.875	2.3125	2.33333	2	2.66667	2.83333	4	4	1	1	5	5
0	4469	0	31	0	1	2	1	1.375	3.125	2.5	2.5	3.16667	3.5	4	4	1	0	5	0
0	4471	0	69	1	0	1	1	2.4375	2.5	2	2	1.16667	1.5	4	4	1	1	4	4
0	4473	1	36	1	0	2	1	2.5625	2.9375	2.16667	2.5	1.83333	1.83333	4	4	1	1	4	4
0	4475	0	45	1	1	2	1	2.1875	1.9375	2.5	1.83333	2.16667	2	4	4	1	1	4	4
0	4478	0	44	1	3	3	1	1.875	1.9375	1.5	1.66667	2	1.33333	4	4	1	1	5	5
0	4481	1	65	0	1	2	0	2.5625	1.9375	1	0.5	1.16667	1.16667	4	4	0	0	0	0	7
0	4483	1	60	1	2	3	1	2.625	2.625	2	2.66667	1.33333	1.66667	4	4	0	0	0	0	10
0	4484	0	63	1	2	2	1	2.5	2.5625	2.5	2.5	0.833333	0.5	3.5	3.5	1	1	5	5
0	4485	1	60	2	1	3	0	1.0625	0.9375	2	1.66667	2.33333	2.66667	4	4	1	1	5	5
0	4486	0	36	1	1	3	0	2.3125	2.1875	2.83333	2.66667	2	1.33333	4	4	1	1	5	5
0	4487	1	49	1	0	2	0	1.8125	2.375	2	1.66667	2.83333	4	4	4	0	0	0	0	17
0	4490	1	48	2	1	2	1	2.75	3	2.16667	2.33333	1.83333	1.66667	2	2	1	1	5	5
0	4491	0	32	1	1	3	1	2.8125	3	2.16667	1.83333	1.66667	1.83333	4	4	1	1	5	5
0	4493	1	20	0	0	2	1	2.375	2	1.66667	2	1.33333	1.33333	3.5	3	1	1	5	5
0	4494	1	53	0	0	2	0	2.8125	3.125	2.33333	3.5	2.33333	2.33333	3.5	4	1	1	4	4
0	4495	0	34	0	0	1	0	2.375	2.8125	2.33333	2.33333	1	1.16667	4	3.5	0	0	1	1	7
0	4497	0	41	1	2	3	0	2.5	3.1875	3.33333	3	2.66667	2	4	4	1	1	5	5
0	4499	2	40	4	2	3	0	2.4375	2.5	2	2.66667	3.66667	1.66667	3.5	4	0	1		5
0	4500	1	44	2	1	2	1	3	3.3125	3.5	3.33333	3.66667	3.83333	4	4	0	0	0	0	7
0	4503	1	36	0	0	3	1	1.625	2.25	1	1.16667	2.16667	2.33333	3.5	3.5	1	1	4	4
0	4507	0	35	0	2	3	0	2.3125	2.1875	1.83333	1.66667	0.833333	1.33333	2	3.5	1	1	4	4
0	4523	1	74	2	0	2	1	2.5	2.5	1.83333	1.83333	2.16667	2.16667	4	4	1	1	5	5
0	4525	0	34	0	3	3	0	2.5	2.8125	1.33333	1.83333	1.83333	2	4	3.5	1	0	3	2
0	4528	0	68	1	3	3	1	2.875	3.3125	2.5	3.33333	1.66667	1.16667	3.5	4	1	1	5	5
0	4529	0	40	0	1	2	0	2.3125	2.25	1.83333	2	1.33333	1.16667	4	4	0	0	0	0	15
0	4536	1	37	0	1	3	1	2.6875	2.9375	2.16667	2.83333	3	2.5	4	4	1	1	4	4
0	4538	1	21	0	0	2	1	2.875	2.9375	1.16667	2.33333	0.833333	0.666667	2.5	1	1	1	5	5
0	4539	1	20	0	0	2	1	2.9375	3.4375	2.66667	3	2.83333	2.33333	3.5	3.5	1	1	5	5
0	4545	0	60	0	2	2	0	3.125	2.625	2.83333	2.33333	2.33333	2.66667	4	4	1	1	4	4
0	4549	0	41	2	1	2	1	1.4375	1.75	1.33333	0.333333	1	0.833333	0.5	0	0	0	1	0	15
0	4550	0	39	1	2	3	1	3.0625	3.125	2.33333	2.33333	1.83333	2	4	3.5	1	1	4	4
